# Supplementary material
Source: Elsevier journal article supplement (https://www.sciencedirect.com/science/article/pii/S087025511730121X)
Supplement: mmc1 [file S087025511730121X:mmc1.docx]

**RETINOPATIA HIPERTENSIVA EM DOENTES DIPPER VS NÃO DIPPER**

| Nome: |
| --- |
| Nº Processo: |
| Data de Rastreio: |

| **Antecedentes** | **Sim** | **Não** |
| --- | --- | --- |
|  |  |  |
| Doença Cerebrovascular/AVC |  |  |
| EAM |  |  |
| Claudicação Intermitente |  |  |
|  |  |  |
| **FRCV** |  |  |
|  |  |  |
| Diabetes Mellitus | Tipo : |  |
| HTA |  |  |
| Dislipidémia |  |  |
| Tabagismo |  |  |

| **DATA DIAGNÓSTICO HTA** |  |  |
| --- | --- | --- |
